# Supplementary material for: Effects of Combined Gentamicin and Furosemide Treatment on Cochlear Macrophages
Source: MDPI journal article supplement (doi:10.3390/ijms23137343), 2022-07-01
Supplement: s1 [file s1]

## Supplementary Materials

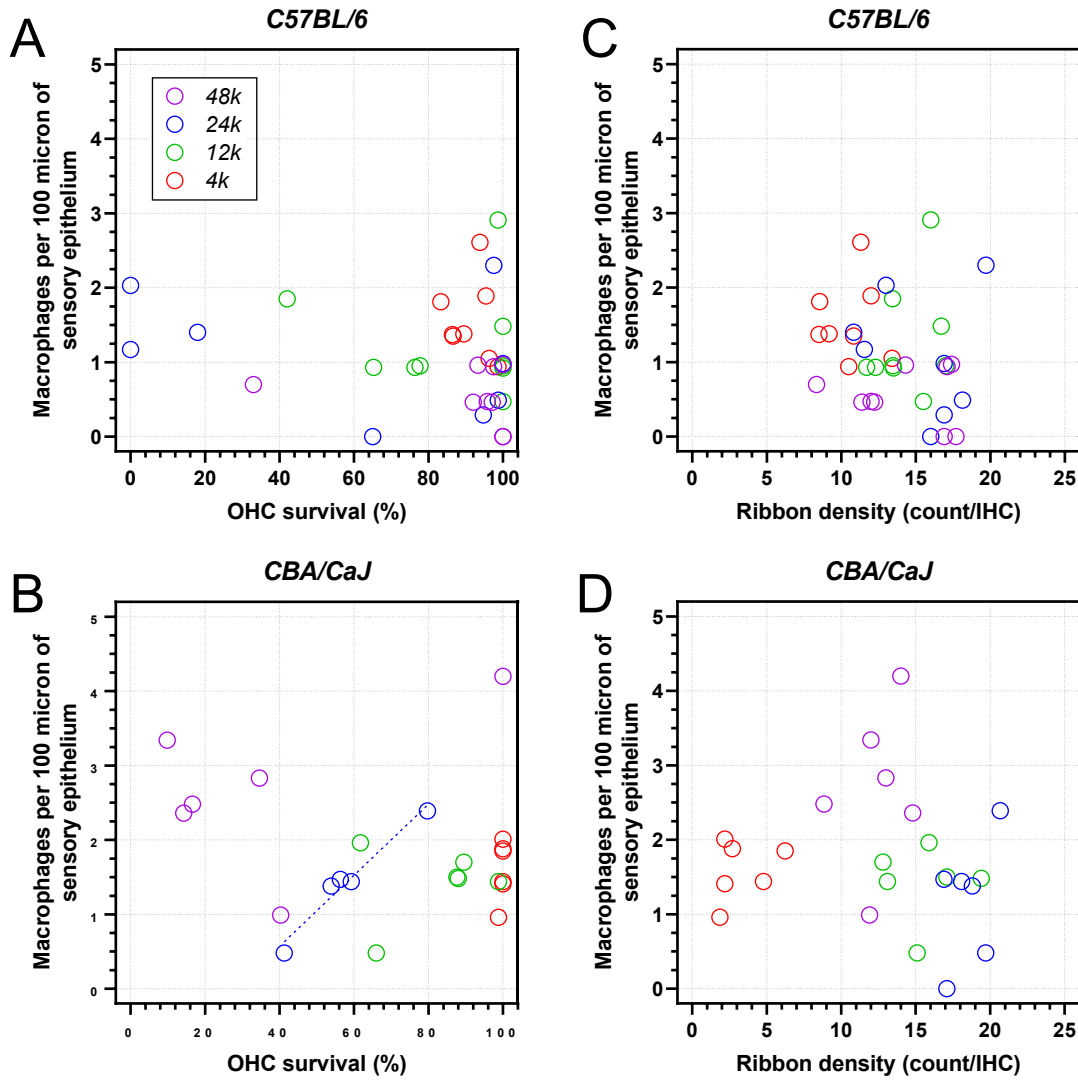

**Supplemental Figure S1:** Effect of 400G/200F treatment on ABR wave-I amplitudes at 90-, 85-, and 80-dB SPL to 12-kHz tones, in *B6* and *CBA* mice.

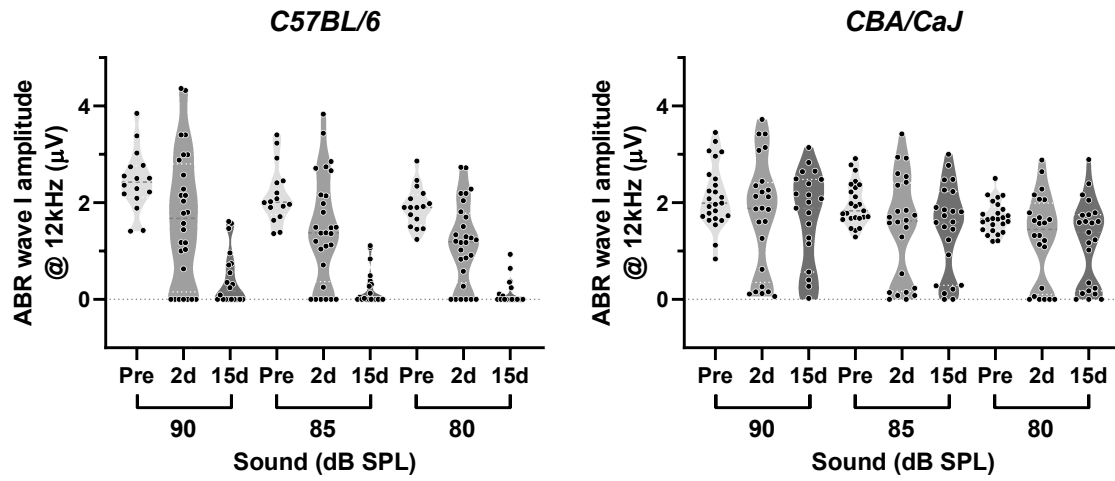

**Supplemental Figure S2:** Correlation between IHC ribbon density and ABR wave-I amplitude (90 dB SPL, 12 kHz) 2 and 15 days after 400G/200F treatment in *B6* and *CBA* mice. Red symbols depict an OHC survival rate  $\geq 90\%$ . Positive correlation was only observed in *B6* mice 2-day posttreatment.

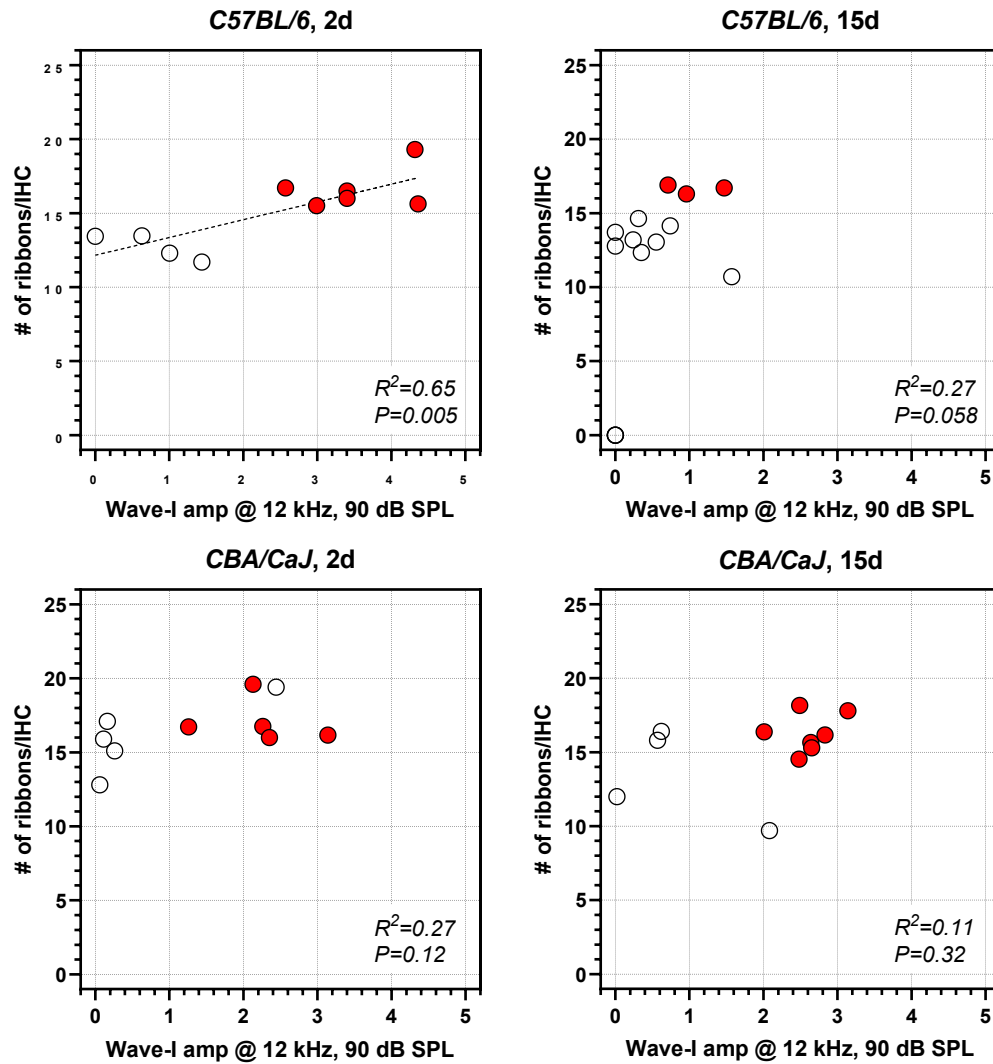

**Supplemental Figure S3:** Correlation between BM macrophage density and OHC survival at multiple cochlear locations 2 days after 400G/200F in *B6* and *CBA* mice. Positive correlation was only observed at the 24-kHz frequency location in *CBA* mice.
